# Supplementary material for: Controlling the quantity of γ-Fe inside multiwall carbon nano-onions: the key role of sulfur
Source: Royal Society of Chemistry journal article supplement (doi:10.1039/d2cc03651g), 2022-01-01
Supplement: d2cc03651g1.pdf [file d2cc03651g1.pdf]

# Controlling the quantity of $\gamma$ -Fe inside multiwall carbon nano- onions: the key role of sulfur

## Supplementary section

Jiixin Song<sup>a+</sup>, Xilong Guo<sup>a+</sup>, Lin Zhang<sup>a+</sup>, Omololu Odunmbaku<sup>b</sup>, Hansong Wu<sup>a</sup>,  
Shanling Wang<sup>c</sup>, Jiqui Wen<sup>c</sup>, Aiqun Gu<sup>c</sup>, Jian Guo<sup>a</sup>, Hong Zhang<sup>a\*</sup> and Filippo  
S.Boi<sup>a\*</sup>

a. College of Physics, Sichuan University, Chengdu, China

b. MOE Key Laboratory of Low-grade Energy Utilization Technologies and Systems, CQU-  
NUS Renewable Energy Materials & Devices Joint Laboratory, School of Energy and Power  
Engineering, Chongqing University, Chongqing 400044, China.

c. Analytical and Testing Center, Sichuan University, Chengdu, China

+ = equally first authors

Corresponding author: [f.boi@scu.edu.cn](mailto:f.boi@scu.edu.cn), [hongzhang@scu.edu.cn](mailto:hongzhang@scu.edu.cn)

## Supplementary Data on filled CNOs (produced with a progressive enhancement of sulfur quantity)

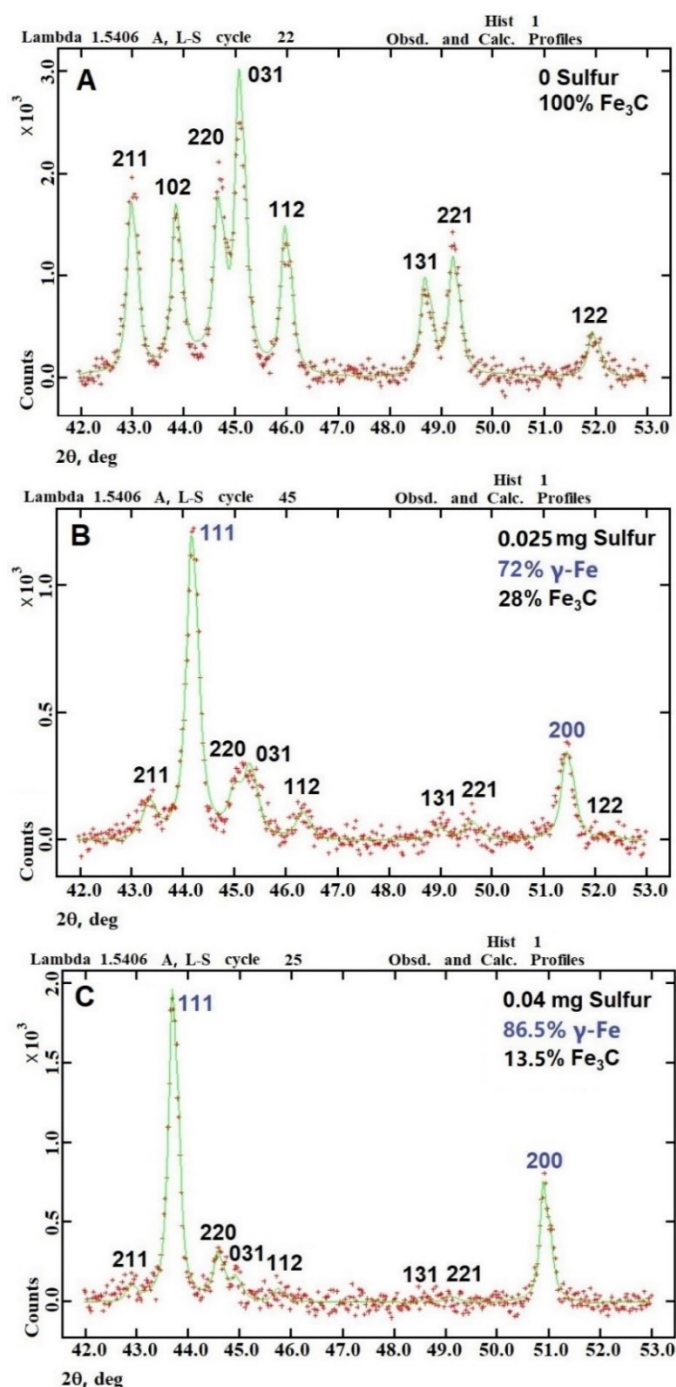

Figure S1: Rietveld refinement analyses of the diffractograms acquired from the samples obtained with a progressive introduction of sulfur in the CVS experiment. We highlight a progressive enhancement in the relative abundance of  $\gamma\text{-Fe}$  as the quantity of sulfur was increased to 0.04 mg, with a transition from a CNT-morphology (without sulfur) to a CNO-morphology in presence of sulfur.

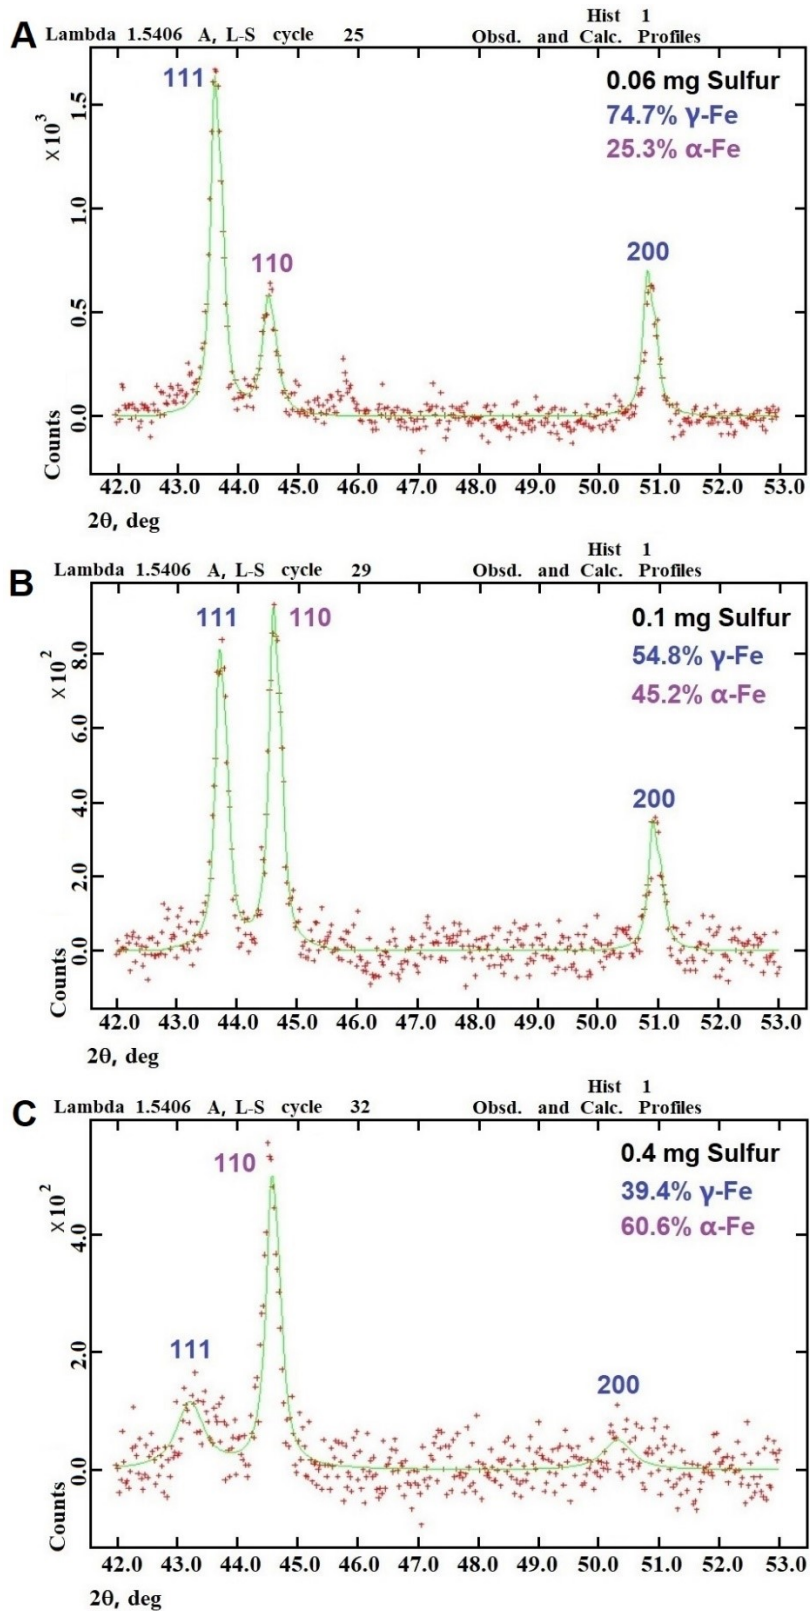

Figure S2: In A-C, additional Rietveld refinement analyses of the diffractograms acquired from CNOs filled with a controlled quantity of  $\gamma$ -Fe. A progressive depletion in the relative abundance of  $\gamma$ -Fe is found for quantity of sulfur larger than 0.04 mg.

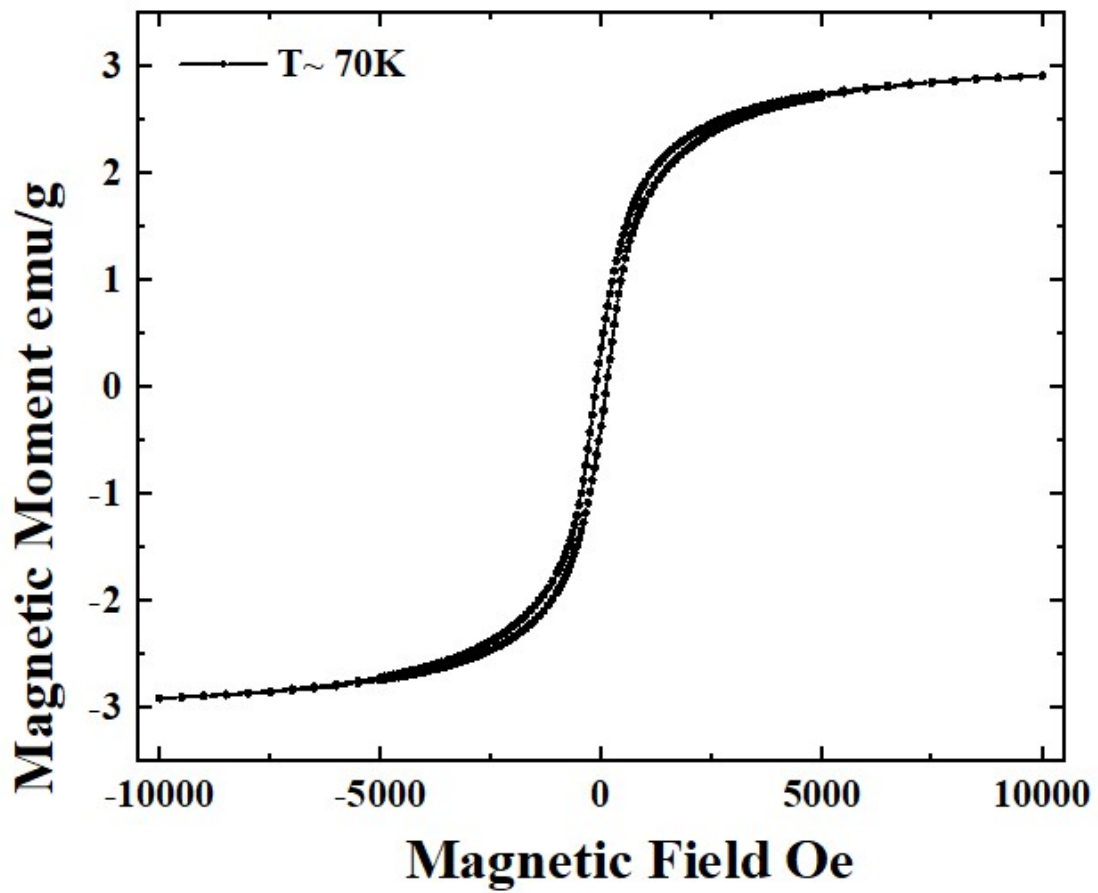

Figure S3: Magnetization hysteresis acquired at  $T \sim 70\text{K}$  with maximum field of 10000 Oe from a CNO-sample encapsulating 80% of  $\gamma\text{-Fe}$  and 20% of  $\text{Fe}_3\text{C}$ .

Supplementary Data on filled CNTs (comparative analyses, samples produced in absence of sulfur)

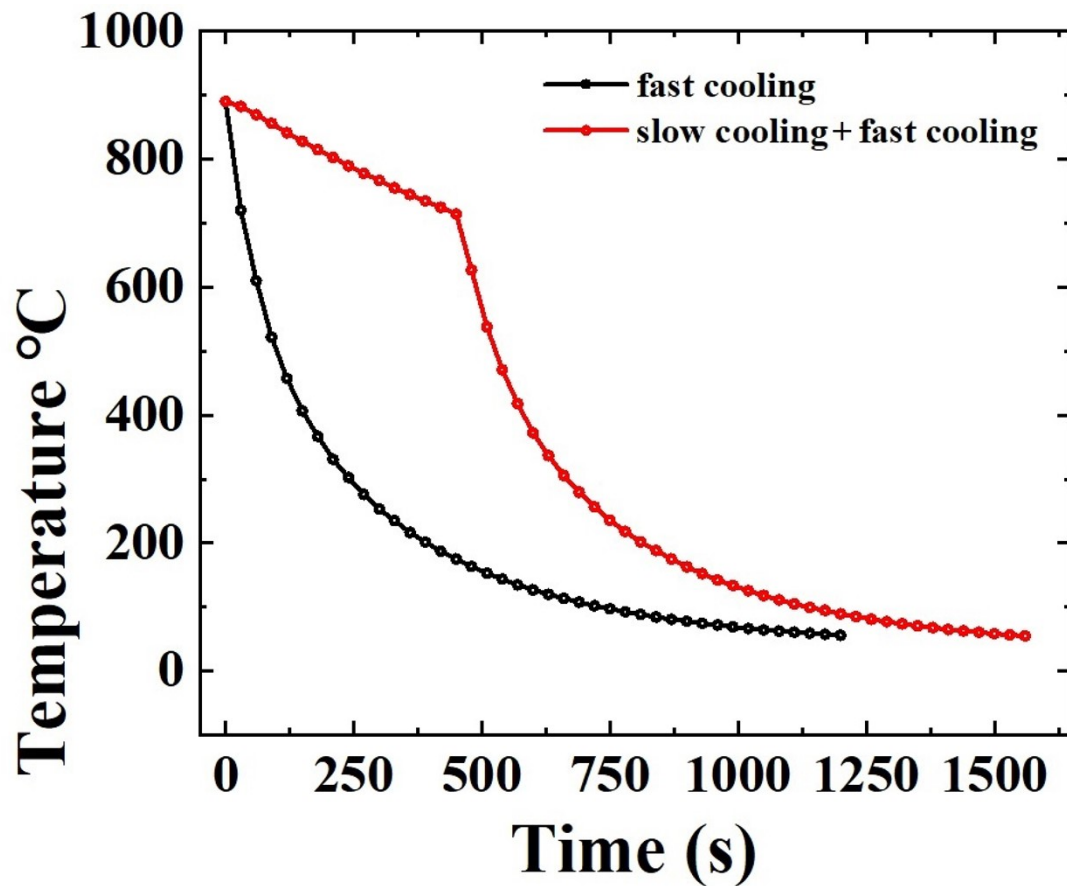

Figure S4: Cooling Profile, highlighting the importance of a combination of slow-cooling and fast-cooling approaches for the enhancement of the  $\gamma$ -Fe content (CNT-case, in absence of sulfur). Noticeably, the only fast cooling method (black) was employed in the CNO-fabrication experiments.

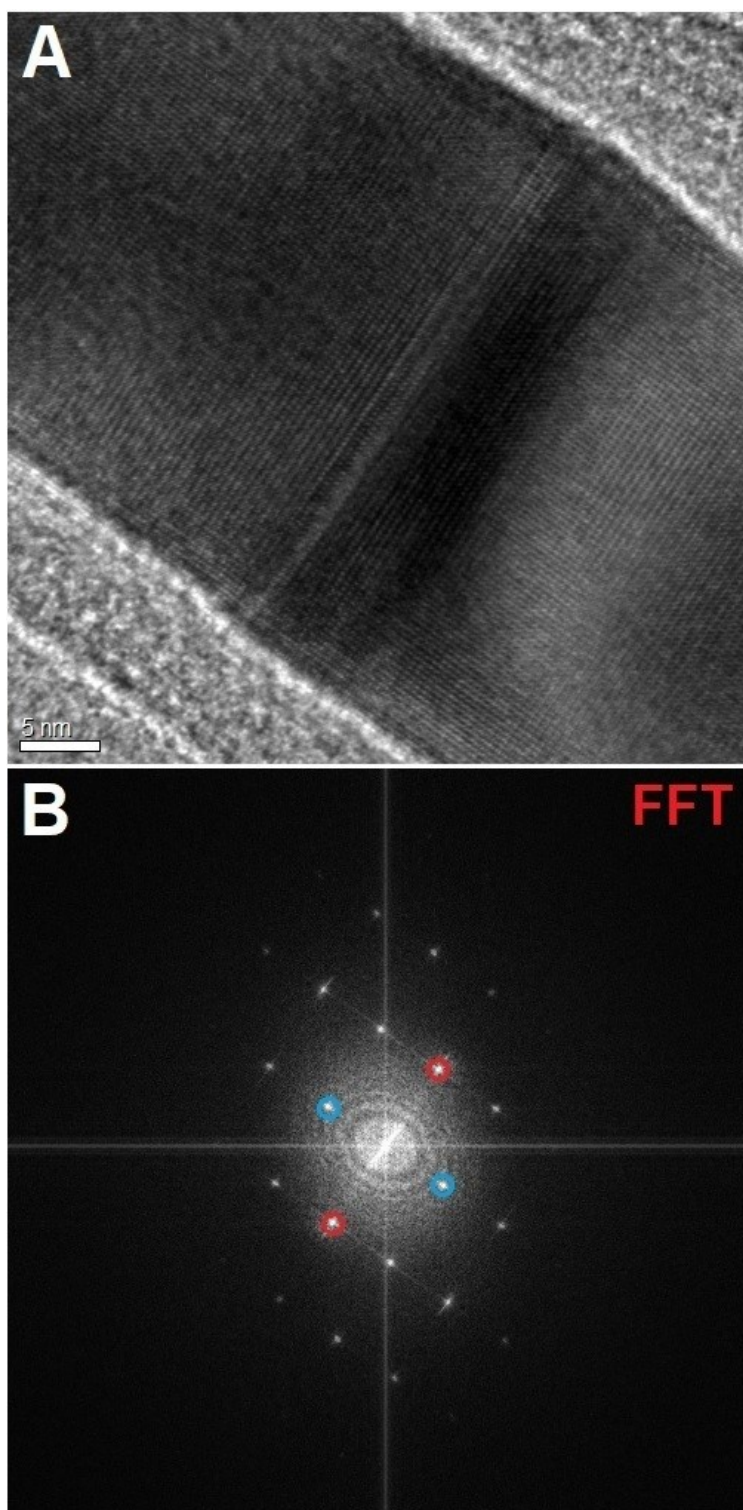

Figure S5: HRTEM and FFT analyses of the nanowire junction, encapsulated in a CNTs produced by pyrolysis of ferrocene/dichlorobenzene mixtures. The analysed area of the Fe<sub>3</sub>C-nanowire, centred-on the step-junction is shown in A while the corresponding FFT analysis is presented in B. Interestingly, a single-crystalline-like arrangement is found within the regions centred-on and in proximity-of the junction, with the identification of preferred 100 (blue circles) and 011 reflections (red circles) of Fe<sub>3</sub>C (space group Pnma) in B.

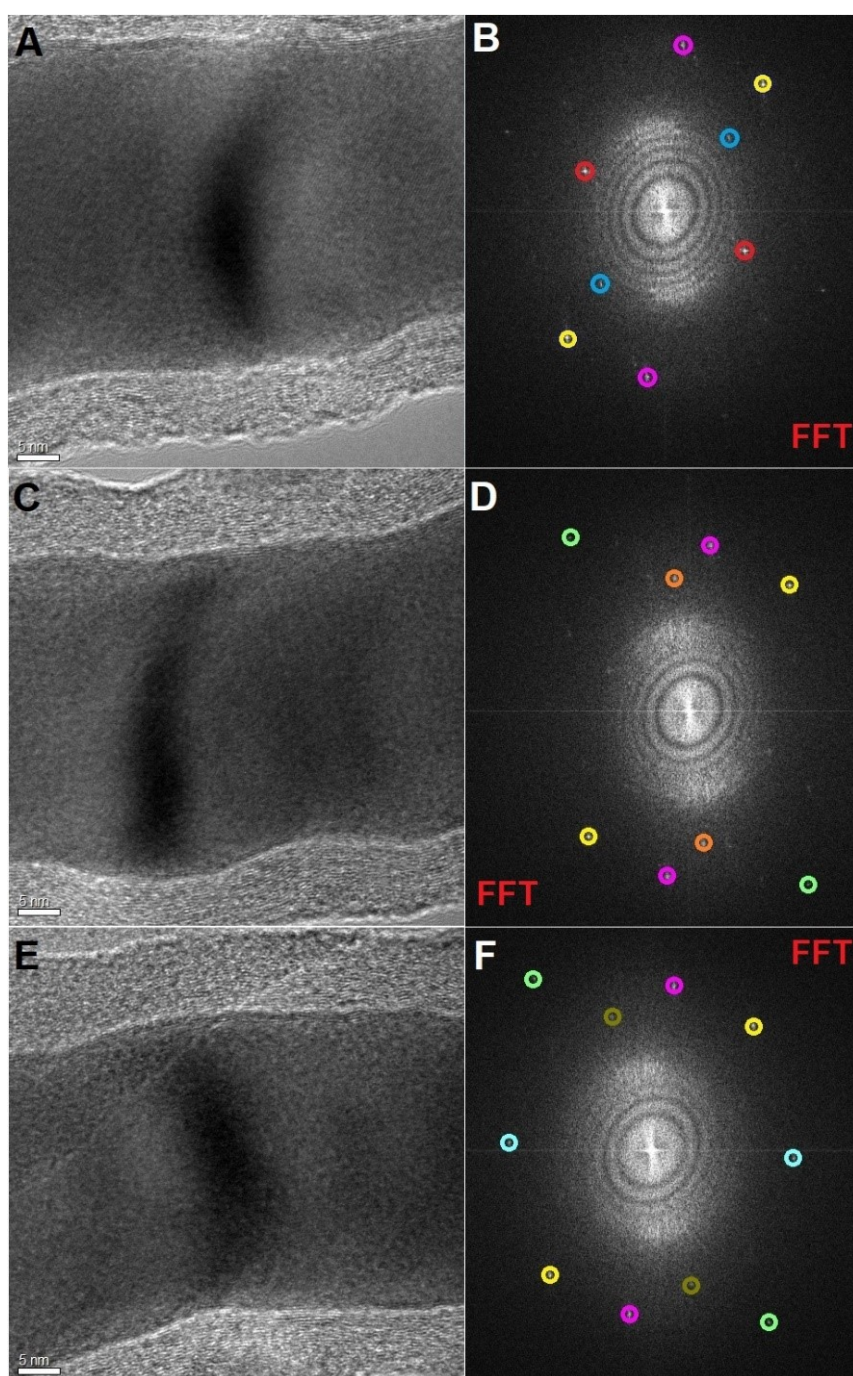

Figure S6: Unusual disorder-rich areas (A,C,E) distributed within the volume of an encapsulated nanowire, with characteristic faceted morphologies, indicative of a possible multi-grain arrangement. Interestingly, FFT analyses of these regions revealed the unusual coexistence of  $\text{Fe}_3\text{C}$  (CIF 1008725) and  $\gamma\text{-Fe}$  (CIF 1534888) within the faceted volume-regions of the nanowire (B, D, F). The observed diffraction spots correspond to the following lattice spacings. The yellow circles  $d \sim 0.189$  nm (131 reflection of  $\text{Fe}_3\text{C}$ ), the blue circles 0.315 nm (111 reflection of  $\text{Fe}_3\text{C}$ ), the pink circles 0.180 nm (200 reflection of  $\gamma\text{-Fe}$ ), the red circles 0.338 nm (101 reflection of  $\text{Fe}_3\text{C}$ ), the orange circles 0.229 nm (002 reflection of  $\text{Fe}_3\text{C}$ ), the green circles 0.145 nm (103 reflection of  $\text{Fe}_3\text{C}$ ), the dark yellow circles 0.217 nm (201 reflection of  $\text{Fe}_3\text{C}$ ), the cyan circles 0.214 nm (211 reflection of  $\text{Fe}_3\text{C}$ ).

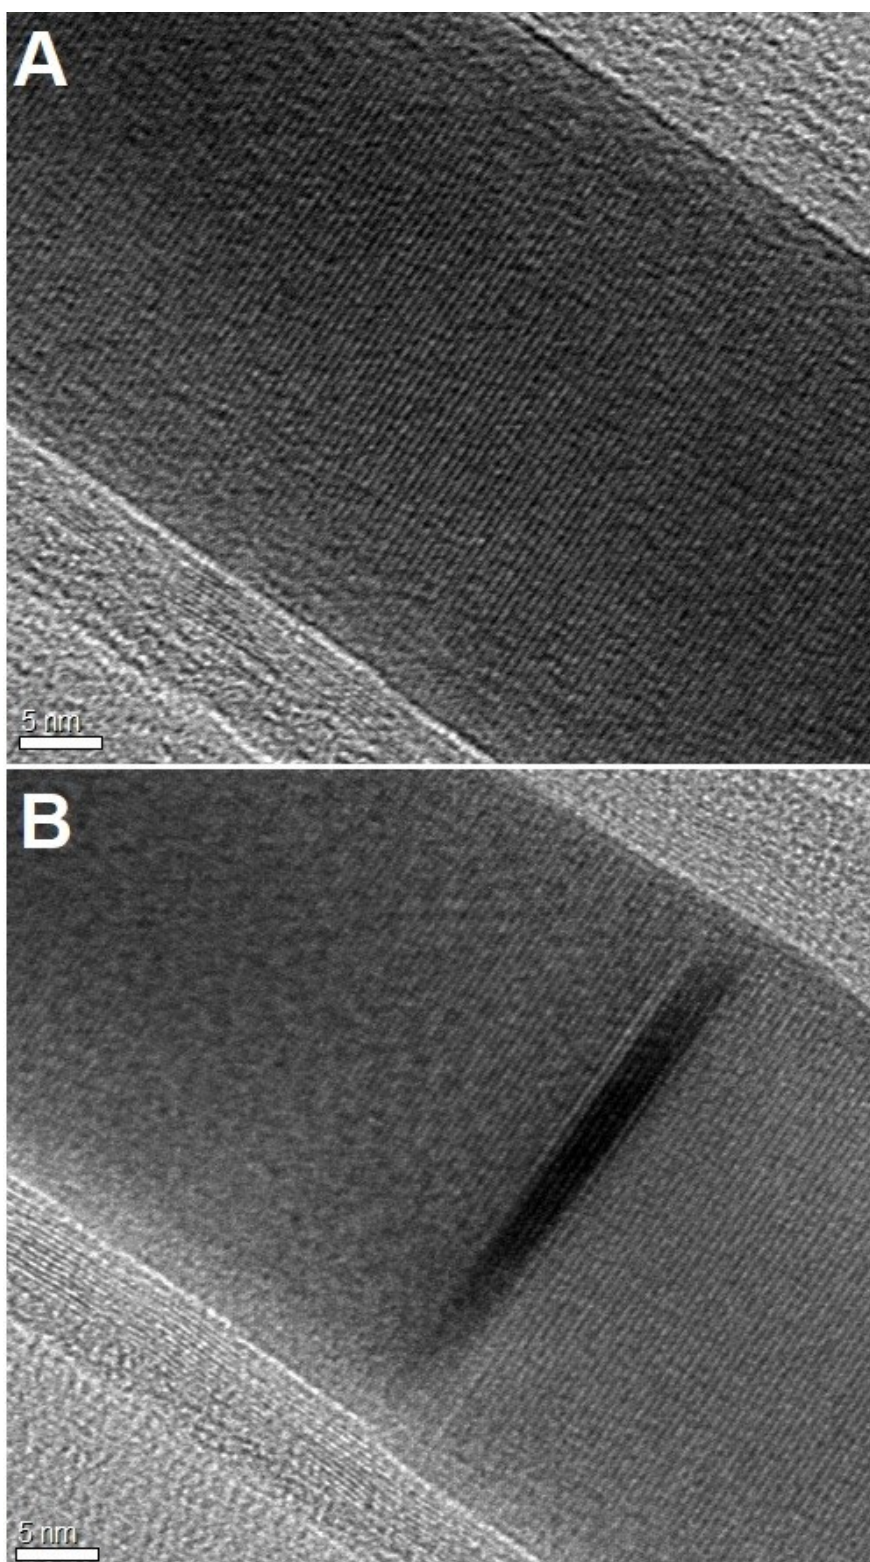

Figure S7: HRTEM micrographs evidencing 1) in A the presence of a single crystalline arrangement of the  $\text{Fe}_3\text{C}$  nanowire, with a preferred 100 orientation with respect to the CNT axis. 2) In B the observation of an unusual step-like junction, possibly arising from the rapid-cooling step.



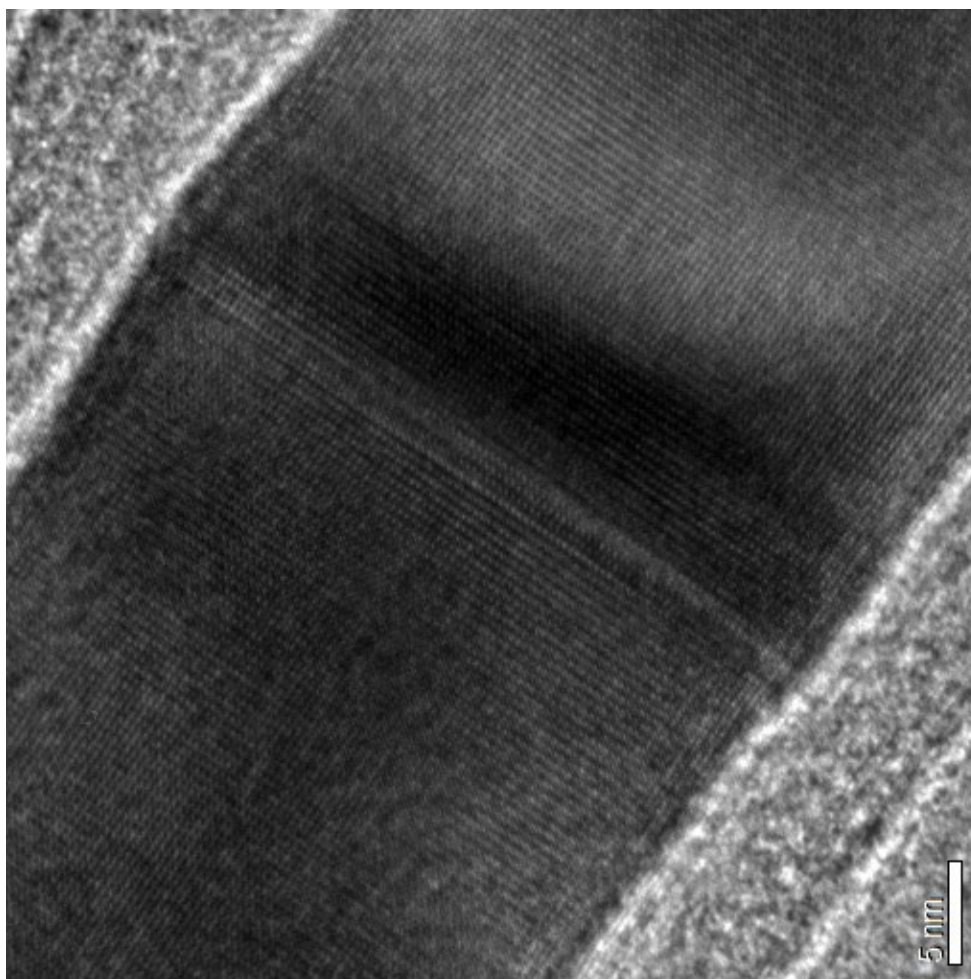

Figure S8: HRTEM micrograph evidencing another example of step-like magnetic junction nucleated in the encapsulated nanowire.

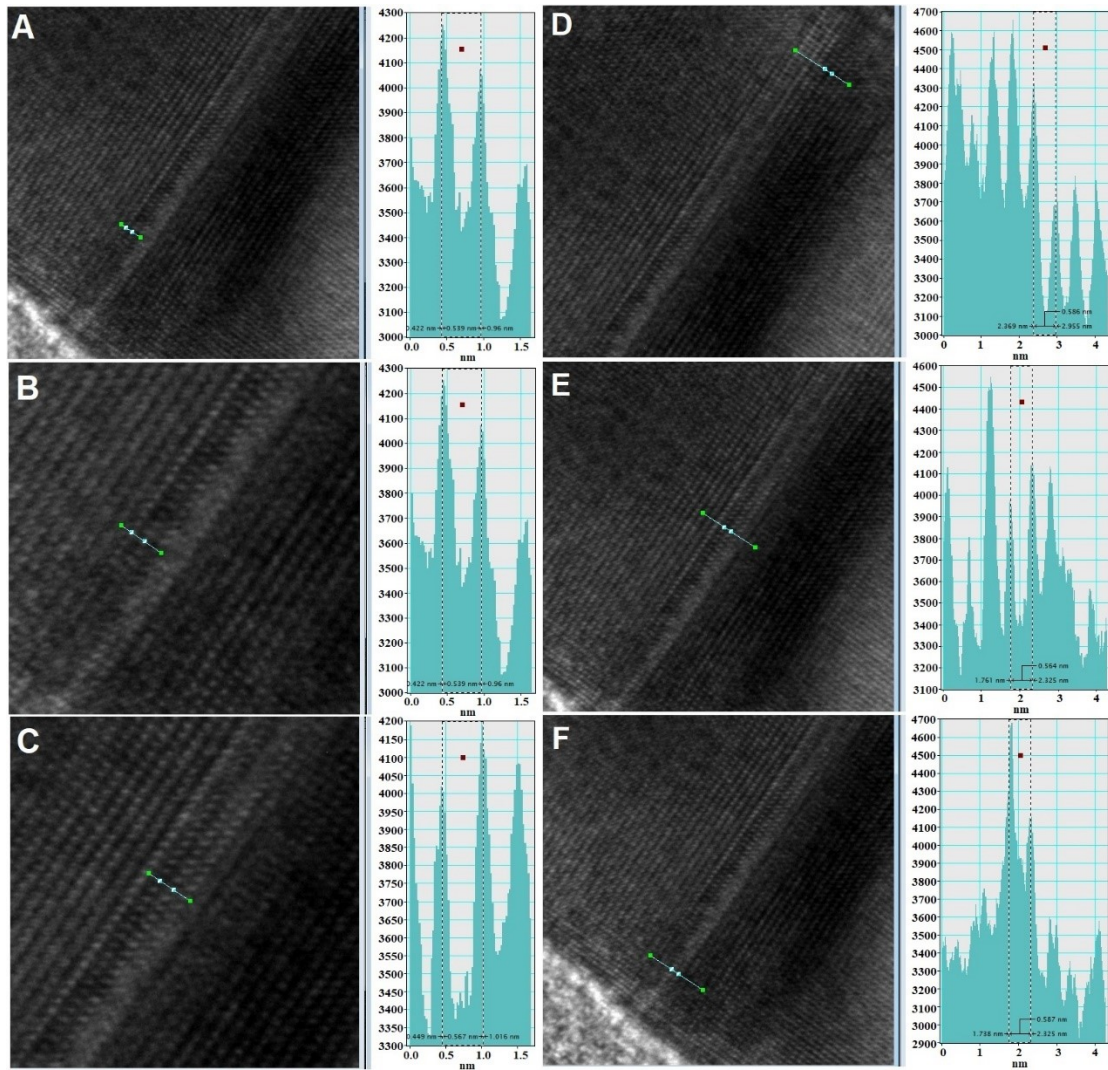

Figure S9: Additional HRTEM analyses performed on the lattice-regions centred on the junction (see A-F), by employing the profile-methodology in the software Digital Micrograph. An unusual enlargement of the 100 lattice-parameter of  $\text{Fe}_3\text{C}$ , with the d-value varying locally from 0.504 nm to 0.587 nm is found.

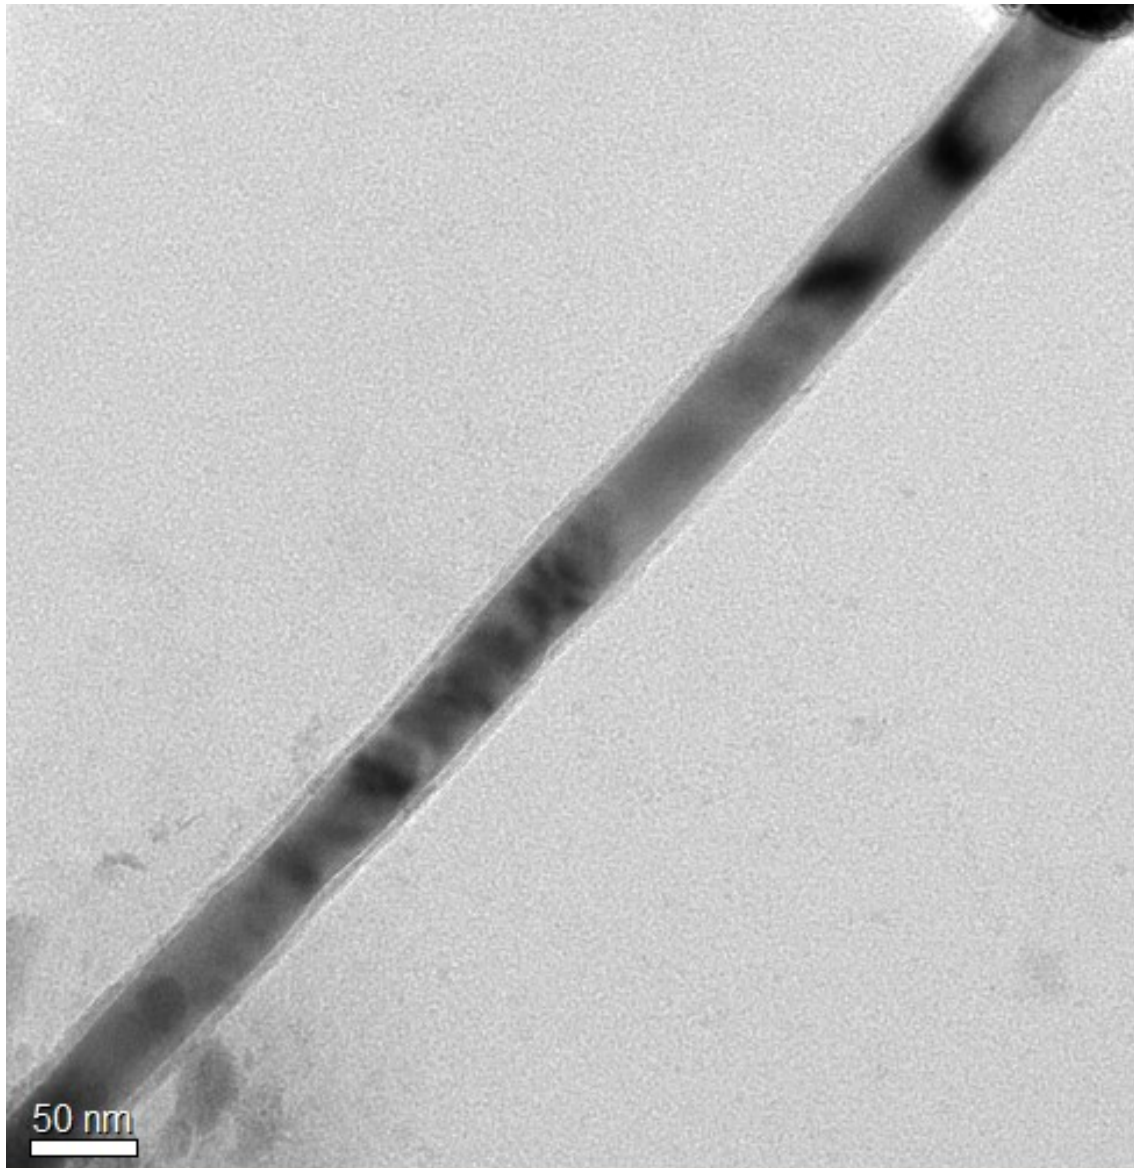

Fig.S10: Additional TEM micrograph exhibiting the high filling rate of the CNT-capillary.

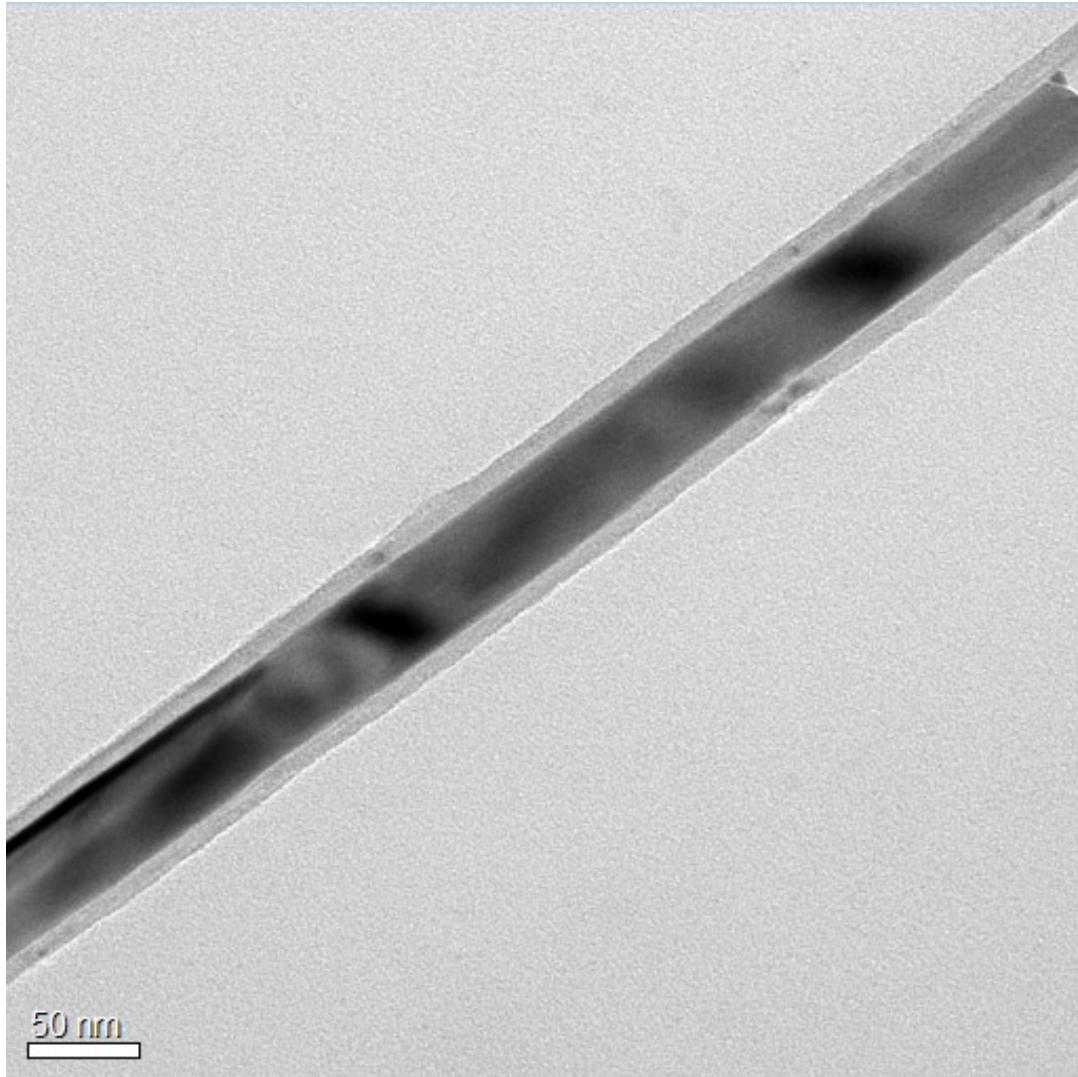

Fig.S11: TEM micrograph showing an additional example of the high filling rate of the CNT-capillary.

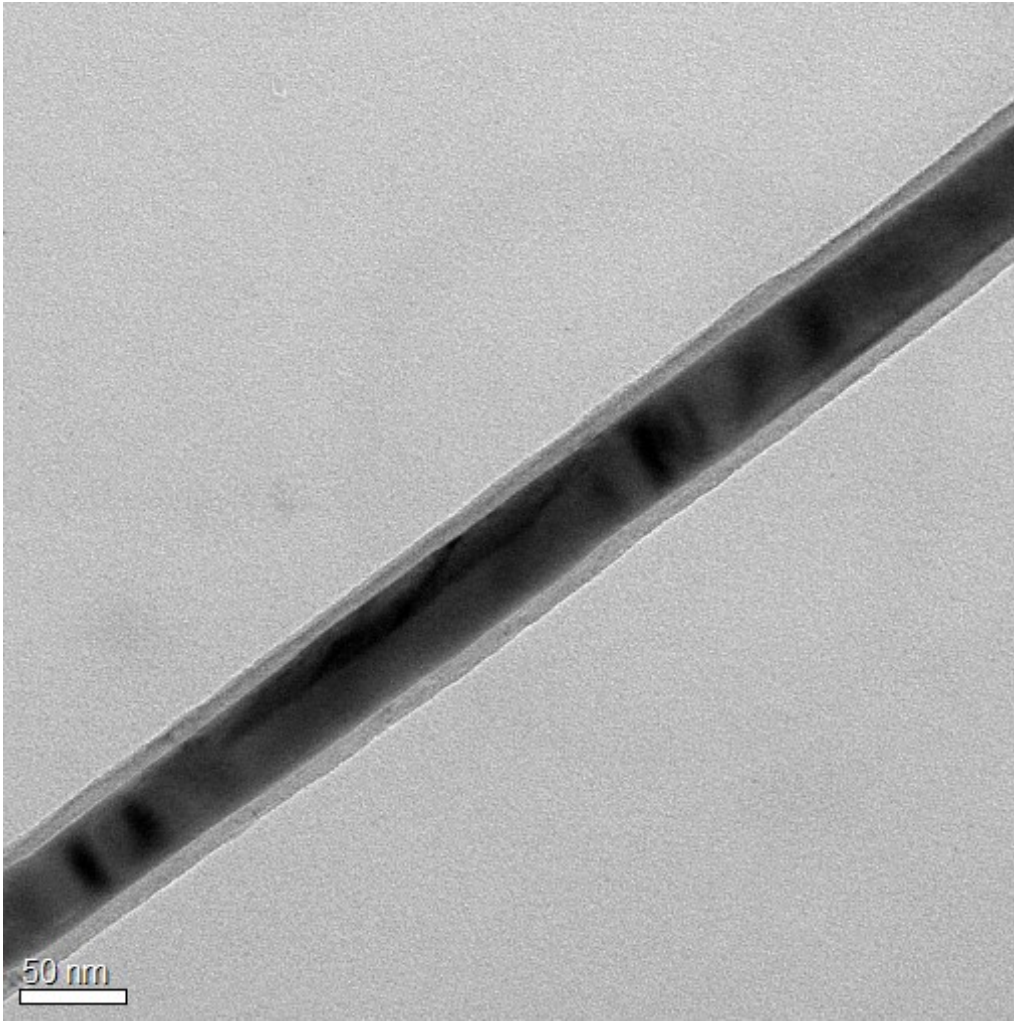

Fig.S12: TEM micrograph showing another example of the high filling rate of the CNT-capillary.

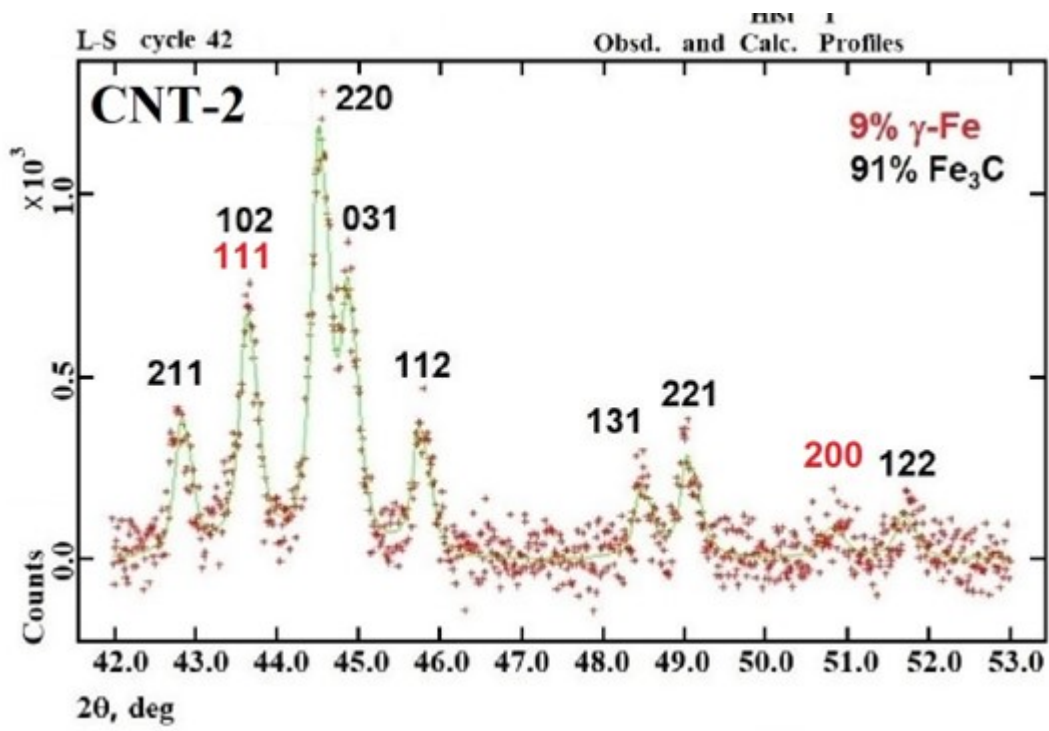

Figure S13: XRD diffractogram (red crosses) and Rietveld refinements (green line) acquired from a sample obtained with a combination of slow and fast cooling methods, in absence of sulfur (see Fig.S4 for cooling profiles).

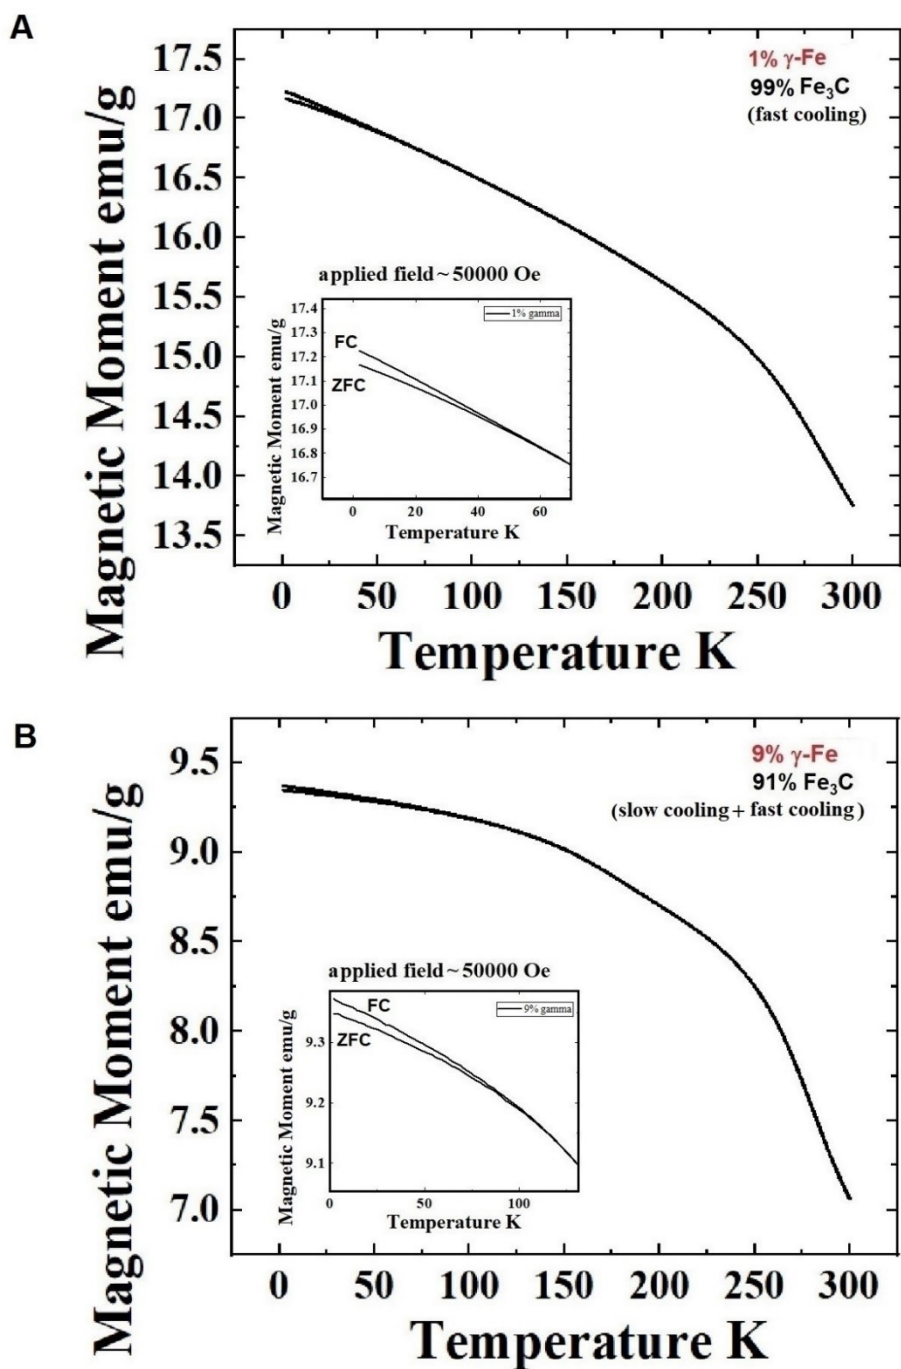

Figure S14: ZFC and FC magnetization curves acquired from two filled-CNT-samples produced by pyrolysis of ferrocene/dichlorobenzene mixtures, in absence of sulfur. The measurements were performed in the T-range from 2K to 300K at an applied field of 50000 Oe. The extremely low value of the magnetic moment appears to indicate a complex magnetic arrangement of the nanowires, strongly driven by the contributions arising from 1) the anisotropic behaviour (shape anisotropy) of the ferromagnetic  $\text{Fe}_3\text{C}$  phase (i.e. magnetic behaviour arising from interplay of shape and crystal anisotropies) and 2) the spatial phase distribution of the ferromagnetic  $\gamma$ -Fe phase, which is found to be located mostly in faceted regions of the nanowire.

## Magnetic Properties of Fe<sub>3</sub>C

Thanks to the significant magneto-crystalline anisotropy which originates from intrinsic spin orbit coupling contributions, single-crystalline iron-carbide can exhibit a ferromagnetic behaviour with large coercivities ( $\sim 1000$ - $2000$  Oe) and saturation magnetizations (expected bulk saturation of  $\sim 169$  emu/g). The encapsulation within the CNOs and/or CNTs allows for the stabilization of this phase and the protection from oxidation. The upper single domain limit for an approximately spherical Fe<sub>3</sub>C single crystal can be calculated by considering the following equation (1) [Blundell S.].

$$r_{Fe_3C} < \frac{9\pi\sqrt{A(K_{sa} - K_{ma})}}{\mu_0 M_s^2} \quad (1)$$

Where  $K_{sa}$  is the shape anisotropy energy density of an elongated Fe<sub>3</sub>C ellipsoid of revolution ( $0.3 \times 10^6$  J/m<sup>3</sup>),  $K_{ma}$  is the magnetocrystalline anisotropy energy density of an elongated Fe<sub>3</sub>C particle ( $K_2 = 1.88 \times 10^5$  J/m<sup>3</sup> and  $K_1 = 0.394 \times 10^6$  J/m<sup>3</sup>),  $M_s$  is the saturation magnetization ( $9.8 \times 10^5$  A/m for Fe<sub>3</sub>C) and  $A$  is the exchange stiffness constant that is  $8.7 \times 10^{-12}$  J/m for Fe<sub>3</sub>C. The exchange stiffness constant can be written as shown in equation (2) [Supp.Ref.1-5]:

$$A = 2JS^2z/a \quad (2)$$

Where  $J$  is the exchange integral,  $a$  is the nearest neighbour distance,  $z$  is the number of sites in the unit cell and  $S$  the spin [Supp.Ref.3].

In the case of Fe<sub>3</sub>C an estimated critical single magnetic domain diameter of approximately  $\sim 42$  nm would be expected.

### Supplementary References:

[Supp Ref.1] Weissker U, Loffler M, Wolny F, Lutz M U, Scheerbaum N, Klingeler R, et al. Perpendicular magnetization of long iron carbide nanowires inside carbon nanotubes due to magnetocrystalline anisotropy. Journal of Applied Physics 2009; 106: 054909.

[Supp Ref.2] Lutz M U, Weissker U, Wolny F, Muller C, Loffler M, Muhl T, et al. Magnetic properties of  $\alpha$ -Fe and Fe<sub>3</sub>C nanowires. Journal of Physics: Conference Series 2010; 200: 072062.

[Supp Ref.3] Blundell S. Magnetism in Condensed Matter: Oxford Master Series in Condensed Matter Physics; 2001.

[Supp Ref.4] Sattler K D, Handbook of Nanophysics: Principles and Methods: CRC Press, Taylor and Francis group; 2011.

[Supp Ref.5] Getzlaff M. Fundamentals of Magnetism: Springer; 2003.
